# Supplementary material for: Whole exome sequencing and replication for breast cancer among Hispanic/Latino women identifies FANCM as a susceptibility gene for estrogen-receptor-negative breast cancer
Source: PubMed Central journal article supplement — medRxiv. 2023 Jan 28:2023.01.25.23284924. Preprint. [Version 1] doi: 10.1101/2023.01.25.23284924 (PMC9901069; doi:10.1101/2023.01.25.23284924), 2023-01-28
Supplement: NIHPP2023.01.25.23284924v1-supplement-1.pdf [file NIHPP2023.01.25.23284924v1-supplement-1.pdf]

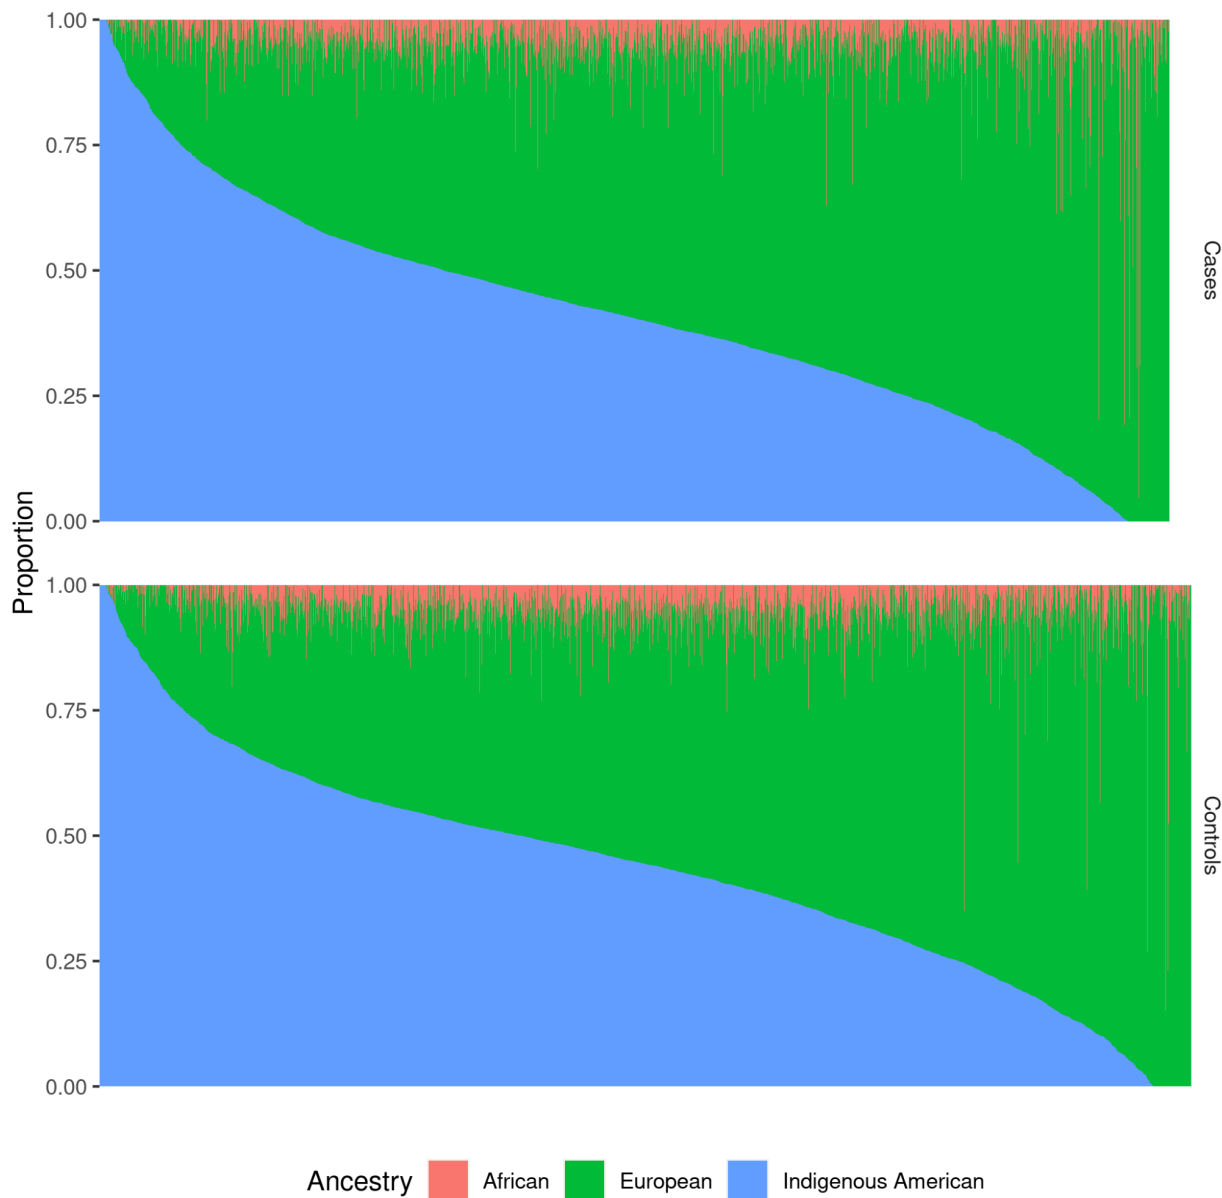

**Supplementary Figure 1: Ancestry Proportions among Cases and Controls.** The Y-axis shows ancestry proportion, per individual, with all ancestry proportions adding up to 1.00. Each horizontal bar represents an individual. Individuals are sorted by proportion of indigenous ancestry from most on the left to least on the right. Ancestry was calculated using ADMIXTURE 1.3.

### A. Hereditary Studies, Overall:

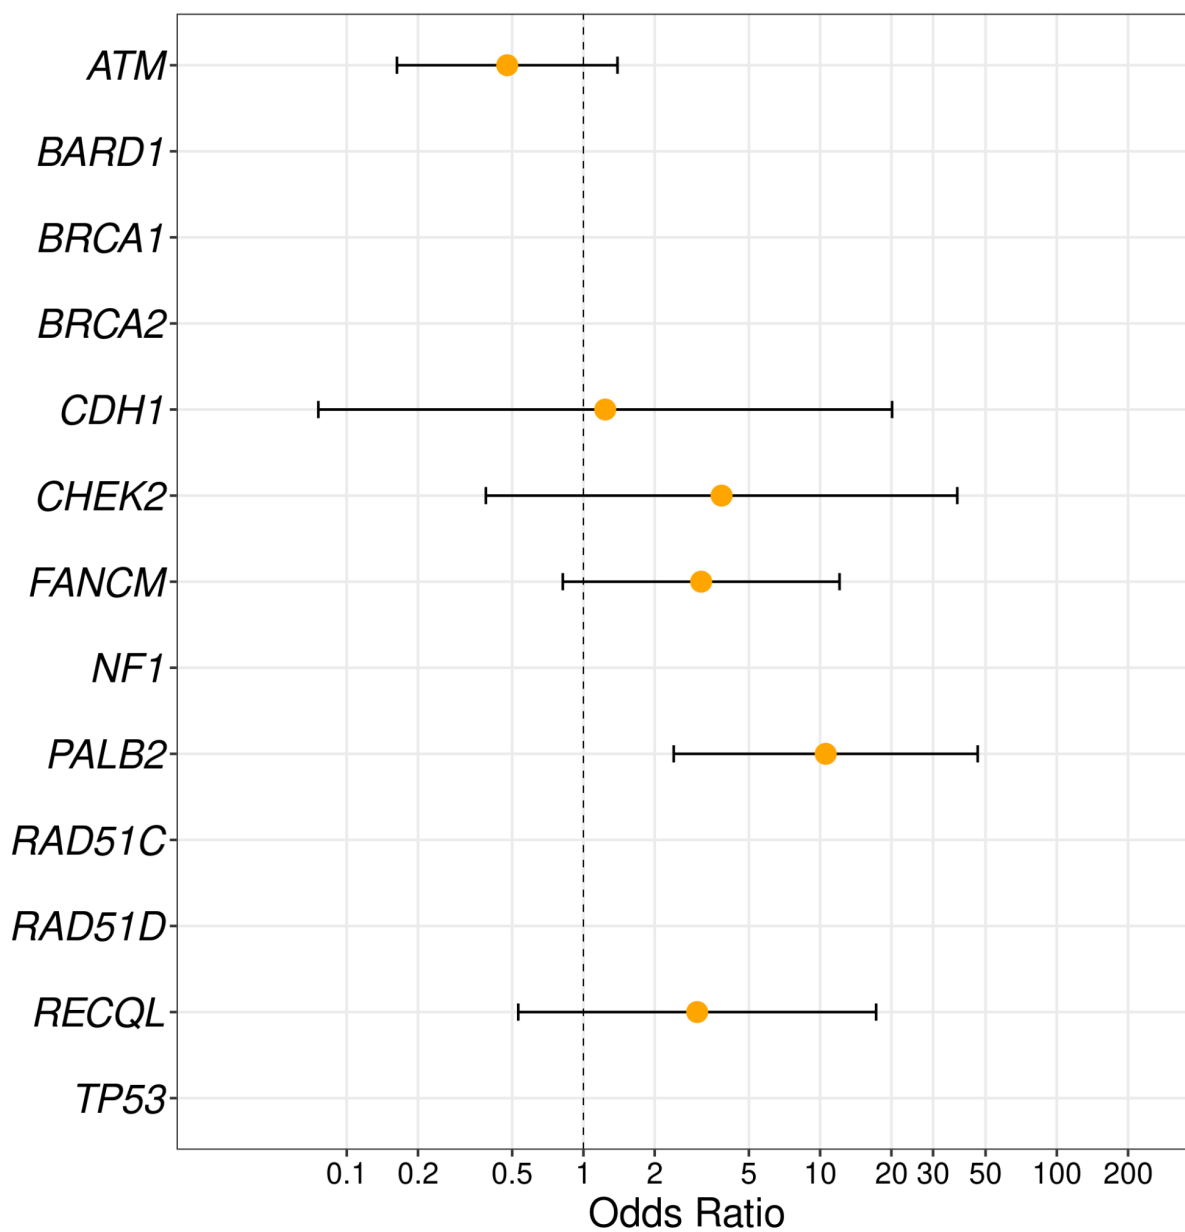

### B. Hereditary Studies, Estrogen Receptor-Positive:

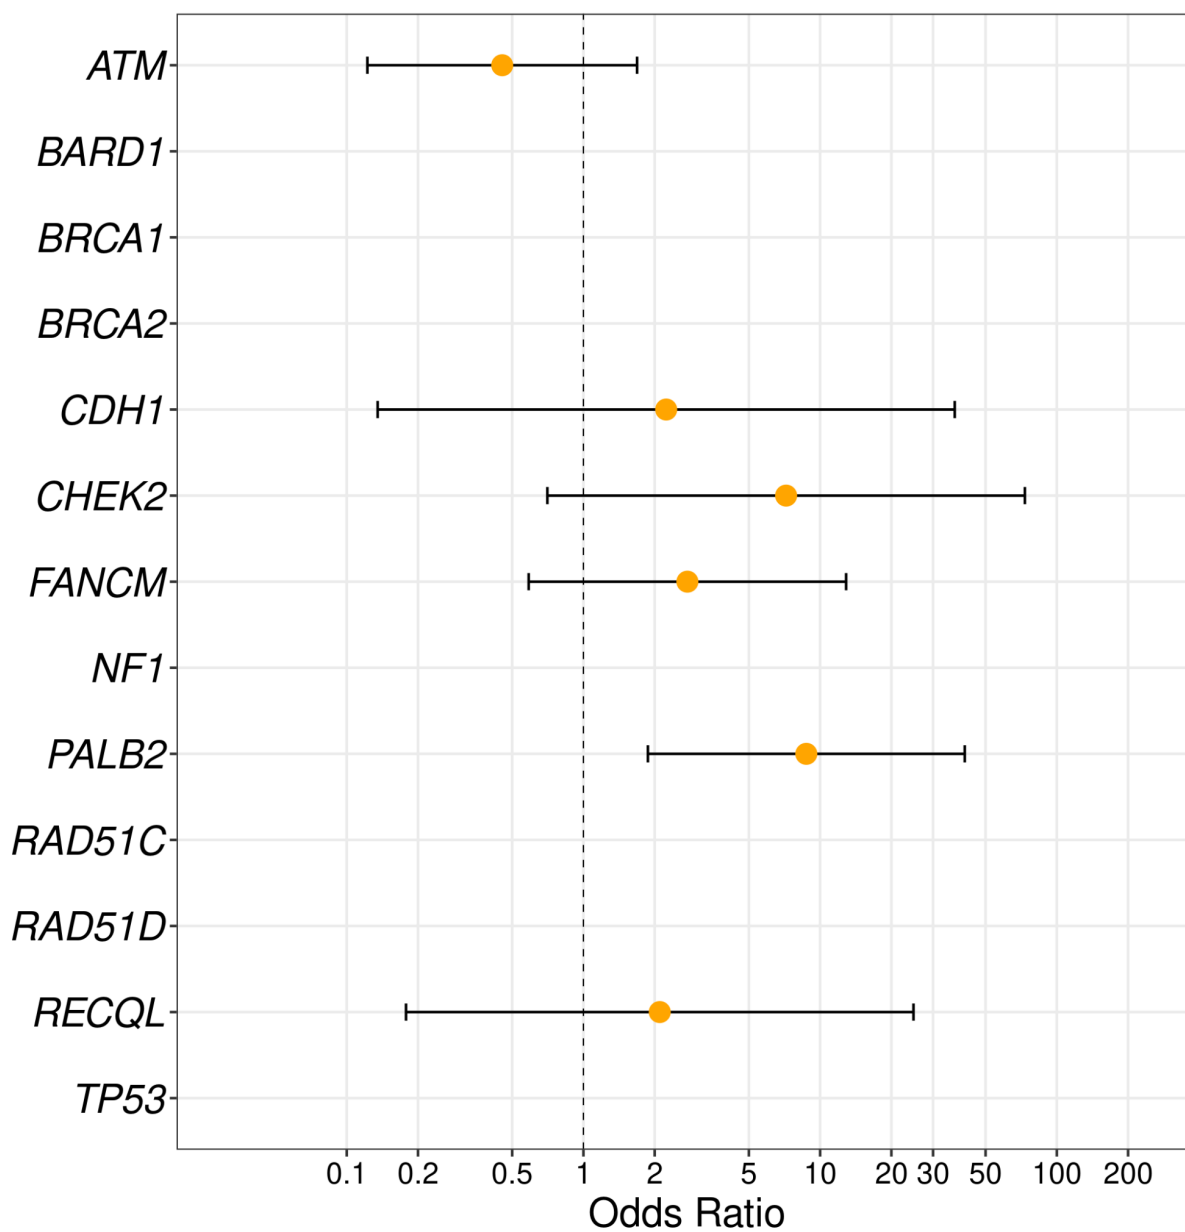

### C. Hereditary Studies, Estrogen Receptor-Negative:

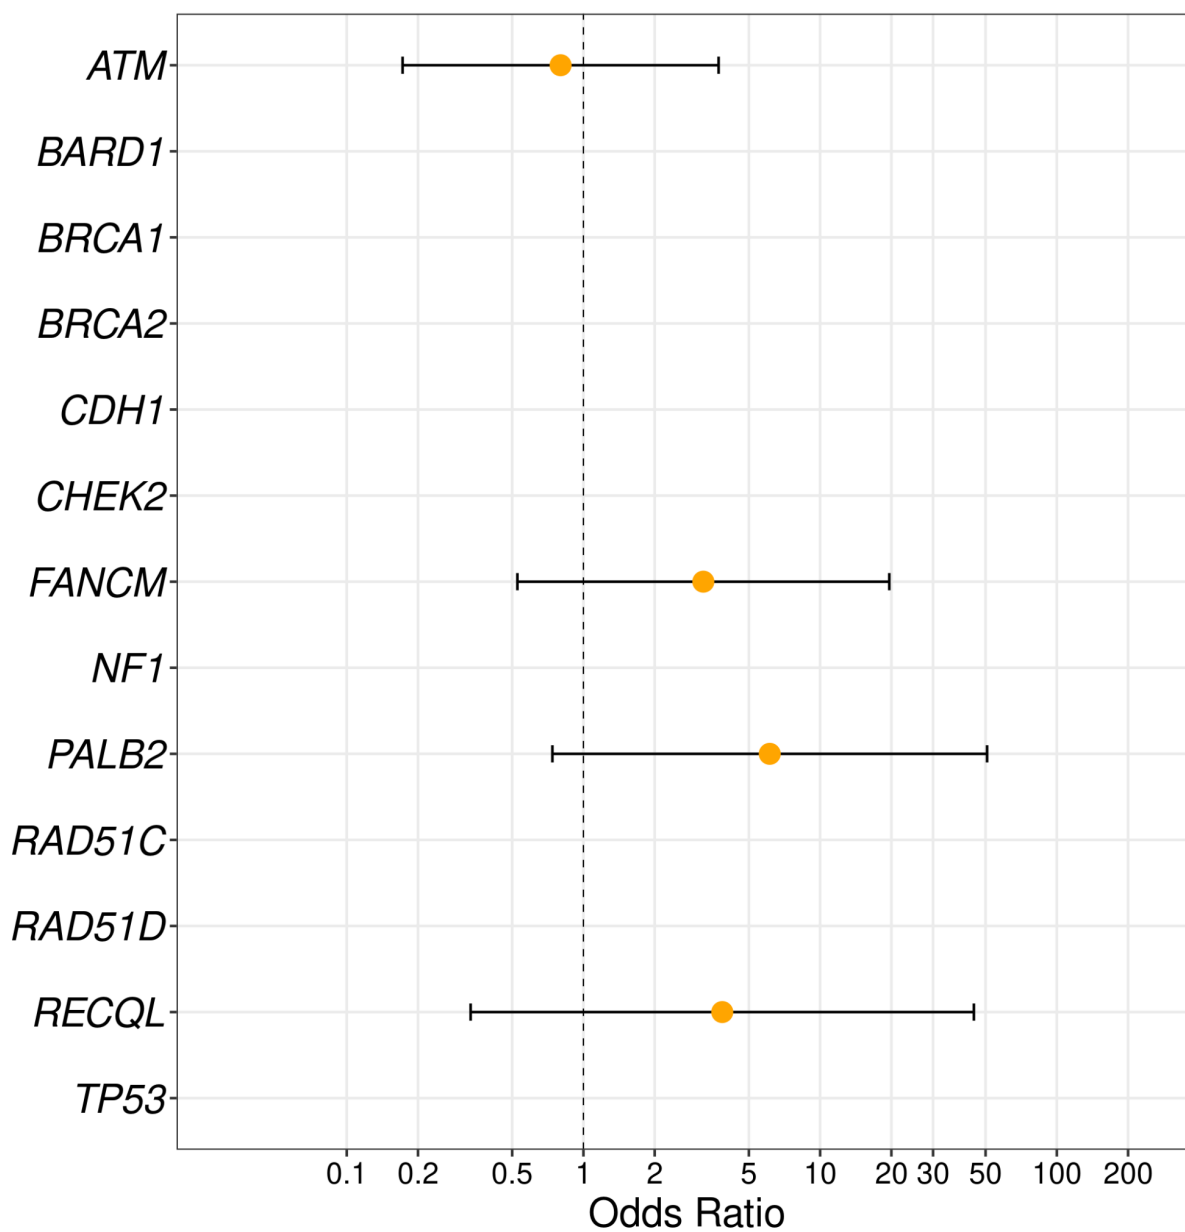

#### D. Unselected Studies, Overall:

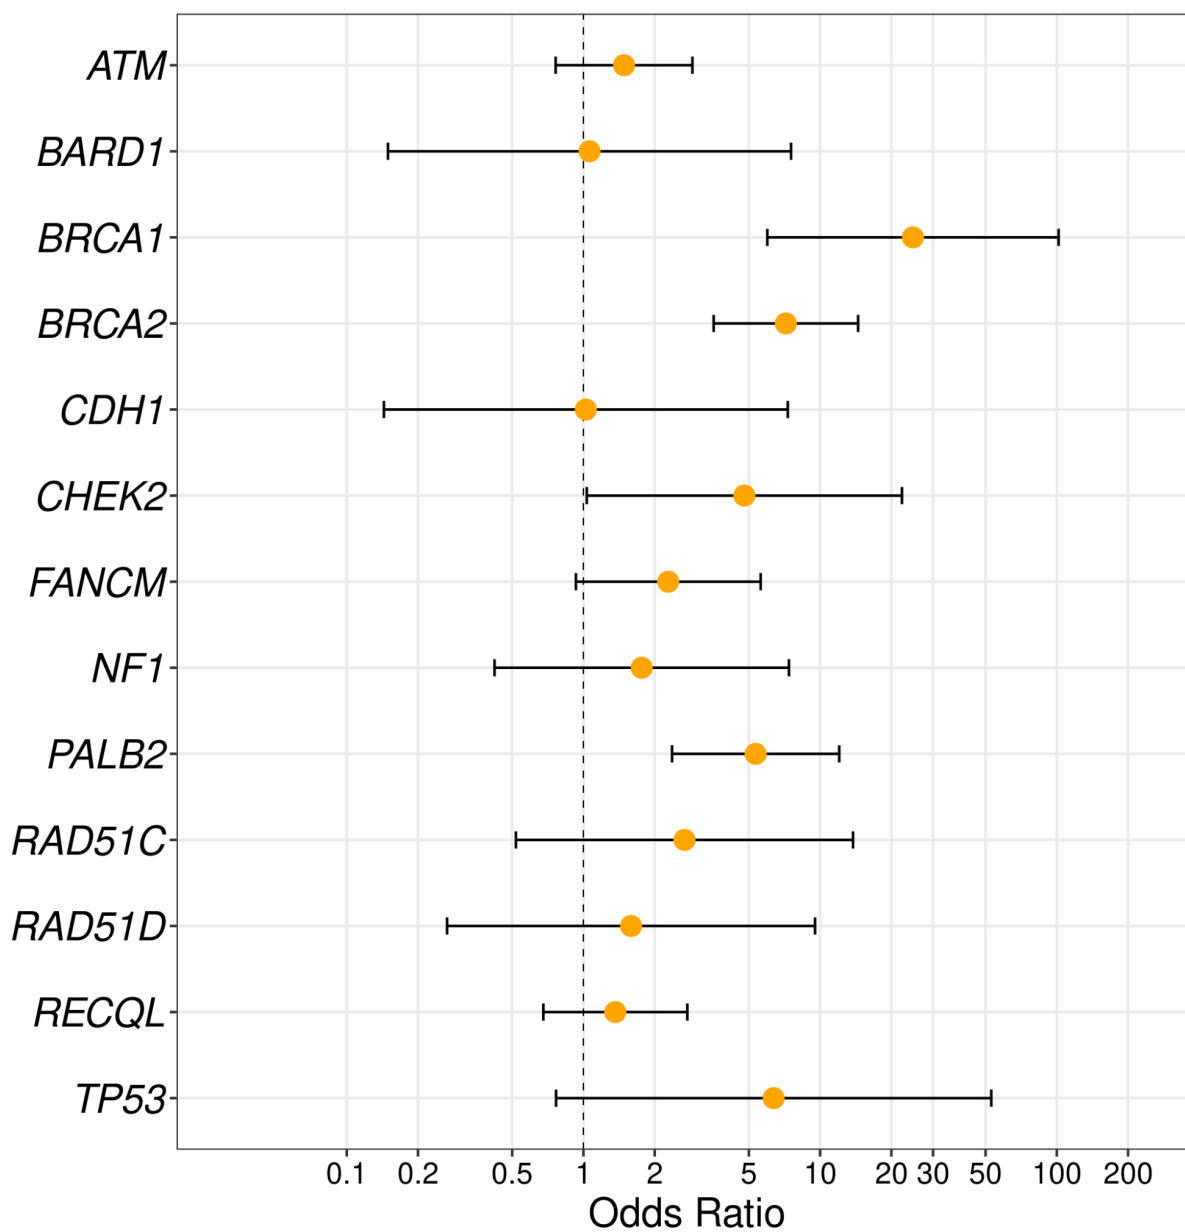

### E. Unselected Studies, Estrogen Receptor-Positive:

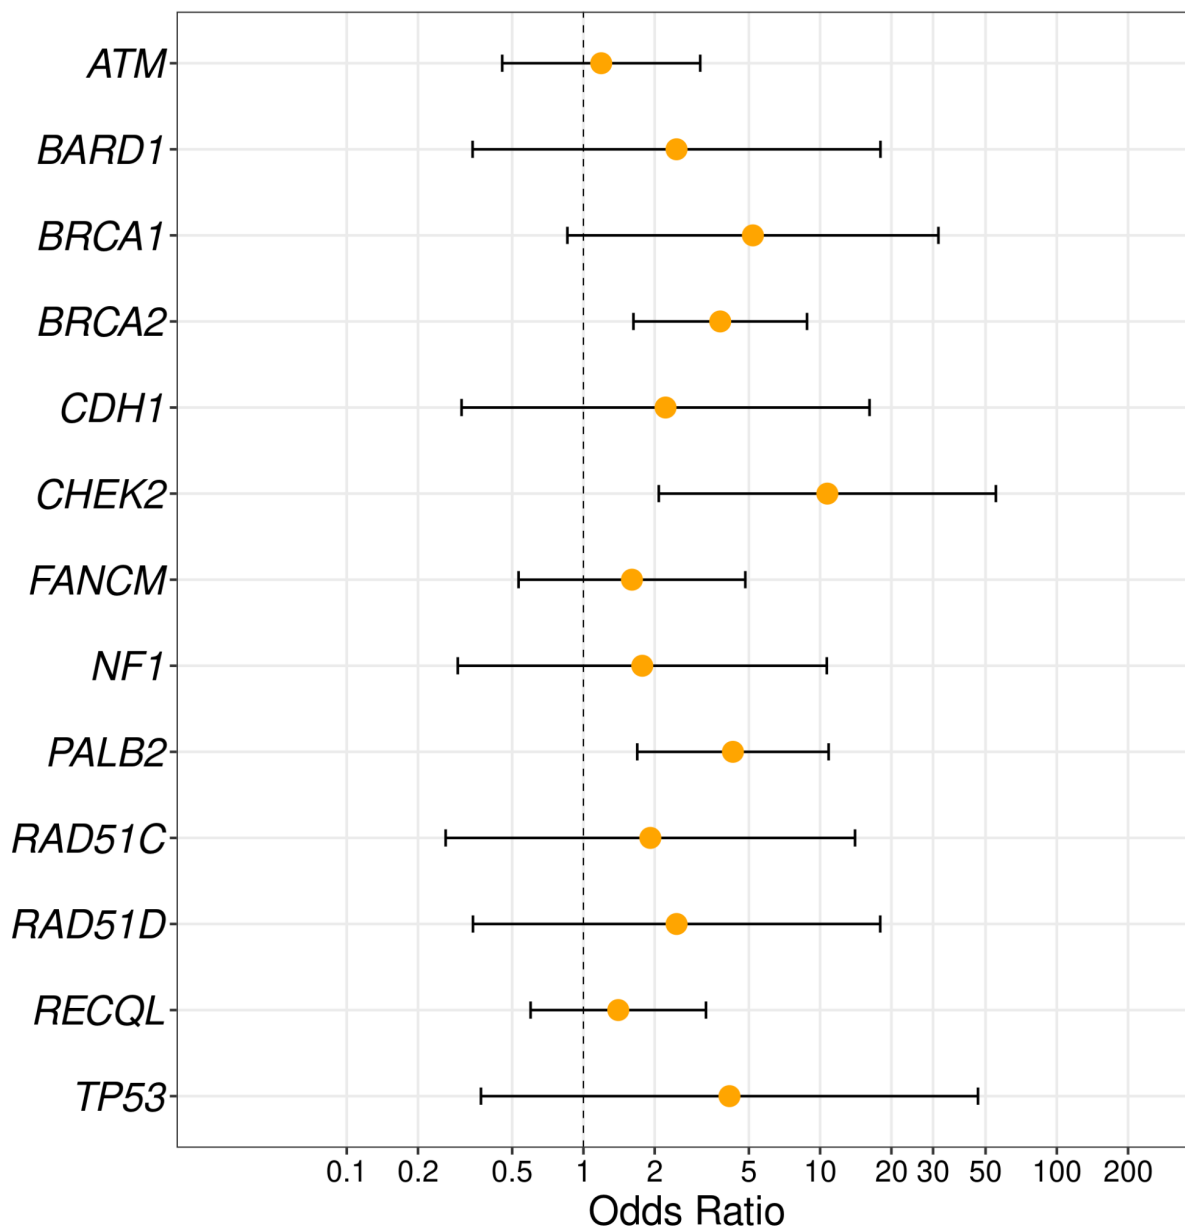

### F. Unselected Studies, Estrogen Receptor-Negative:

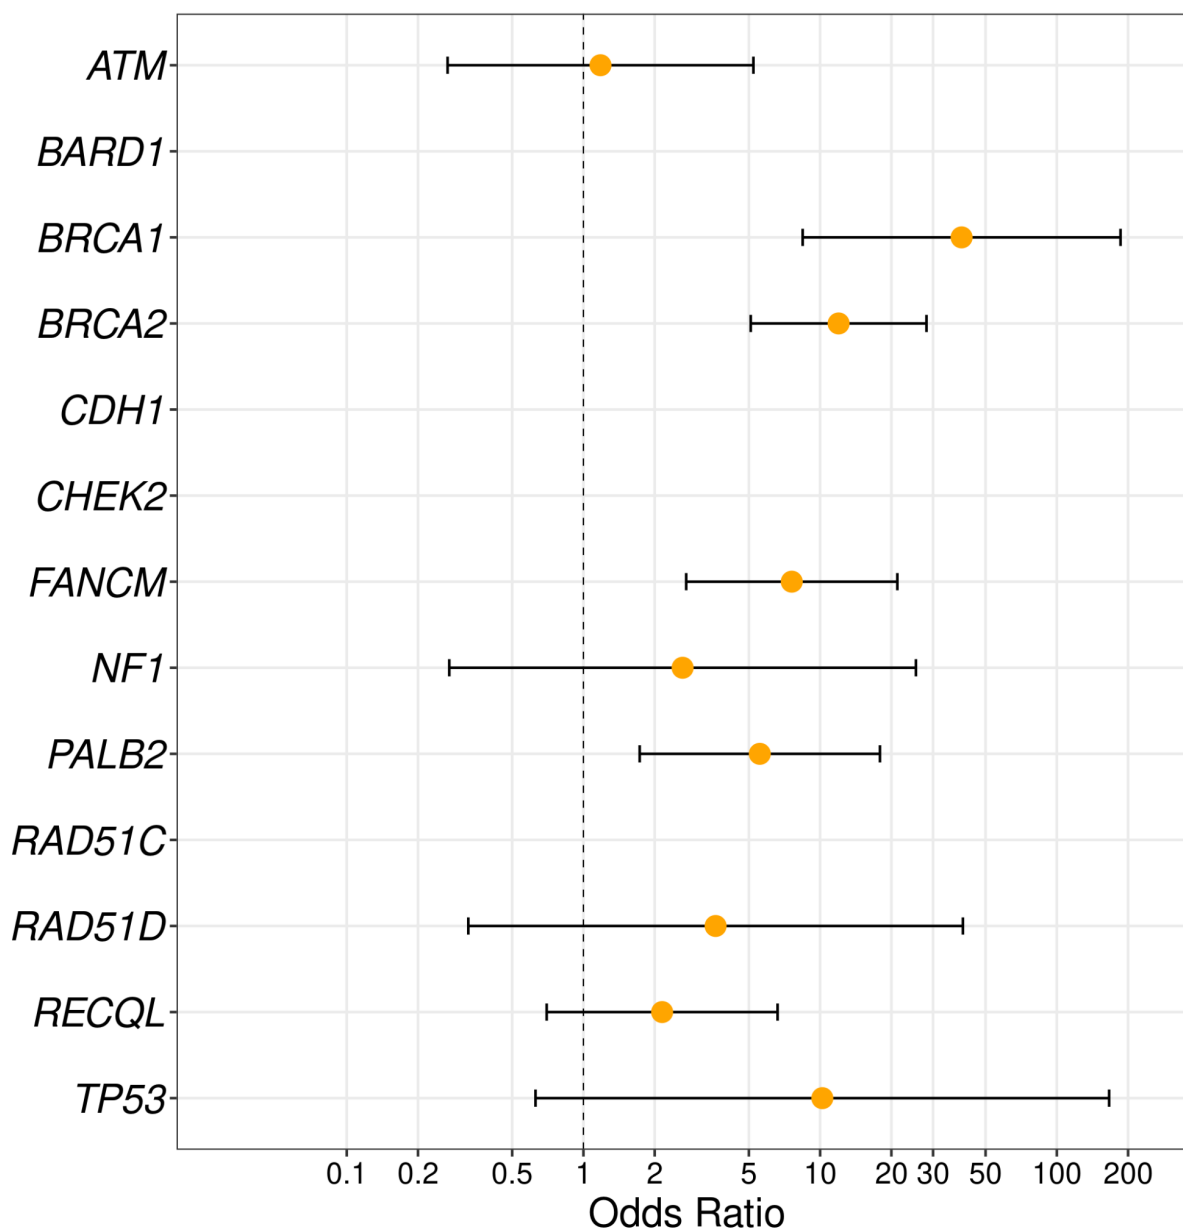

**Supplementary Figure 2: Gene-Based Odds Ratios from Joint Analysis for Breast Cancer Overall, ER-Positive, and ER-Negative Disease, in Hereditary Studies and Unselected Studies Separately.** Odds ratios and confidence intervals are presented for participants in hereditary studies with overall breast cancer (Panel A), estrogen receptor (ER)-positive (Panel B), and ER-negative (Panel C) disease, and for participants in unselected studies with overall breast cancer (Panel D), estrogen receptor-positive (Panel E), and estrogen receptor-negative (Panel F) disease. The orange dot represents the point estimate and the bars represent the upper and lower bounds of the 95% confidence intervals. The X-axis describes the odds ratio on a log scale, the Y-axis represents the individual genes. Genes are listed in alphabetical order. *BRCA1* and *BRCA2* are not included for hereditary studies as participants in these studies were

selected for being *BRCA1/2* negative. Participants selected for hereditary risk in the Northern California Breast Cancer Family Registry were excluded from this analysis as the selection criteria were different than those used in other studies.



**Supplementary Table 1: Gene-Based Results for Known Genes from Joint Analysis without Exome-Wide Significance, for Breast Cancer Overall, ER-Positive, and ER-Negative Disease**

| Gene          | Chr | All Studies |                      |                      |
|---------------|-----|-------------|----------------------|----------------------|
|               |     | Overall     | ER-Positive          | ER-Negative          |
| <i>ATM</i>    | 11  | 0.73        | 0.63                 | 0.81                 |
| <i>BARD1</i>  | 2   | 0.44        | 0.17                 | 0.67                 |
| <i>CDH1</i>   | 16  | 0.78        | 0.55                 | N/A                  |
| <i>CHEK2</i>  | 22  | 0.01        | $3.6 \times 10^{-5}$ | 0.71                 |
| <i>NF1</i>    | 17  | 0.62        | 0.46                 | 0.37                 |
| <i>RAD51C</i> | 17  | 0.39        | 0.34                 | N/A                  |
| <i>RAD51D</i> | 17  | 0.27        | 0.27                 | $1.9 \times 10^{-3}$ |
| <i>RECQL</i>  | 12  | 0.52        | 0.75                 | 0.40                 |
| <i>TP53</i>   | 17  | 0.11        | 1.00                 | $1.6 \times 10^{-3}$ |

Chr=Chromosome; ER=estrogen receptor.

P-values are from gene-based SKAT-O analyses.

**Supplementary Table 2: Gene-Based P-Values from Joint Analysis with Suggestive Significance, for Breast Cancer Overall, ER-Positive, and ER-Negative Disease**

| Gene           | Chr | Overall  | ER-Positive | ER-Negative |
|----------------|-----|----------|-------------|-------------|
| <i>ACSM6</i>   | 10  | 0.04     | 0.23        | 3.20E-03    |
| <i>BRCA1</i>   | 17  | 2.30E-10 | 0.03        | 4.40E-16    |
| <i>BRCA2</i>   | 13  | 8.40E-10 | 3.30E-04    | 8.00E-15    |
| <i>CCDC40</i>  | 17  | 0.15     | 0.12        | 1.60E-03    |
| <i>CDHR2</i>   | 5   | 0.13     | 0.47        | 3.00E-03    |
| <i>CEACAM8</i> | 19  | 0.22     | 0.19        | 4.90E-03    |
| <i>CHEK2</i>   | 22  | 0.01     | 3.60E-05    | 0.71        |
| <i>DHRS4L2</i> | 14  | 3.60E-03 | 0.1         | 0.19        |
| <i>FANCG</i>   | 9   | 0.15     | 0.29        | 3.50E-03    |
| <i>FANCM</i>   | 14  | 9.80E-03 | 0.11        | 4.10E-07    |
| <i>FBP1</i>    | 9   | 0.37     | N/A         | 6.10E-03    |
| <i>FSHR</i>    | 2   | 0.13     | 3.80E-03    | N/A         |
| <i>GEMIN2</i>  | 14  | 6.60E-03 | 0.07        | N/A         |
| <i>GSTA1</i>   | 6   | 7.90E-03 | 7.60E-03    | 0.26        |
| <i>LCP2</i>    | 5   | 0.15     | 0.31        | 1.80E-03    |
| <i>MAPK12</i>  | 22  | 8.30E-03 | 0.05        | 0.05        |
| <i>MBP</i>     | 18  | 3.90E-04 | 7.60E-04    | 0.51        |
| <i>MKI67</i>   | 10  | 0.42     | 0.57        | 3.20E-04    |
| <i>PALB2</i>   | 16  | 1.80E-08 | 1.30E-05    | 5.90E-05    |
| <i>PRDM2</i>   | 1   | 6.30E-03 | 0.02        | 0.57        |
| <i>RAD51D</i>  | 17  | 0.27     | 0.27        | 1.90E-03    |
| <i>SAMD15</i>  | 14  | 0.02     | 0.01        | 2.90E-03    |
| <i>SELP</i>    | 1   | 7.10E-03 | 0.05        | 0.17        |
| <i>SLC26A5</i> | 7   | 0.06     | 0.02        | 4.40E-03    |

|                |    |          |          |          |
|----------------|----|----------|----------|----------|
| <i>TP53</i>    | 17 | 0.11     | 1        | 1.60E-03 |
| <i>TTC4</i>    | 1  | 7.00E-03 | 6.00E-04 | 0.2      |
| <i>TTLL9</i>   | 20 | 3.80E-03 | 4.40E-03 | N/A      |
| <i>WDR93</i>   | 15 | 0.03     | 0.56     | 1.60E-03 |
| <i>ZNF404</i>  | 19 | 0.01     | 1.20E-04 | N/A      |
| <i>ZSCAN22</i> | 19 | 0.03     | 4.60E-03 | 0.93     |

Chr=Chromosome; ER=estrogen receptor;

P-values are from gene-based SKAT-O analyses. Genes with P<0.01 in any of the three analyses are included in the table.

\* Discovery participants were selected for being *BRCA1/2* negative (see methods), replication results are presented for *BRCA1/2*.

**Supplementary Table 3: Gene-Based Odds Ratios and 95% Confidence Intervals from Joint Analysis for Breast Cancer Overall, ER-Positive, and ER-Negative Disease, for Genes with Suggestive Significance**

| Gene           | Chromosome | Overall               | ER-Positive           | ER-Negative           |
|----------------|------------|-----------------------|-----------------------|-----------------------|
| <i>ACSM6</i>   | 10         | 1.81 (0.72 - 4.54)    | 1.44 (0.47 - 4.39)    | 4.29 (1.34 - 13.74)   |
| <i>BRCA1*</i>  | 17         | 24.90 (6.05 - 102.50) | 6.00 (1.08 - 33.41)   | 40.73 (8.90 - 186.50) |
| <i>BRCA2*</i>  | 13         | 6.96 (3.45 - 14.03)   | 3.89 (1.70 - 8.89)    | 10.51 (4.47 - 24.73)  |
| <i>CCDC40</i>  | 17         | 0.62 (0.52 - 0.74)    | 0.57 (0.46 - 0.70)    | 0.51 (0.36 - 0.73)    |
| <i>CDHR2</i>   | 5          | 2.61 (0.51 - 13.46)   | 0.73 (0.07 - 8.06)    | 6.52 (0.89 - 47.68)   |
| <i>CEACAM8</i> | 19         | 2.61 (0.51 - 13.46)   | 2.81 (0.38 - 20.86)   | 7.06 (0.98 - 50.60)   |
| <i>CHEK2</i>   | 22         | 4.75 (1.35 - 16.69)   | 9.77 (2.61 - 36.52)   | NA (NA - NA)          |
| <i>DHRS4L2</i> | 14         | 1.10 (0.99 - 1.23)    | 1.06 (0.93 - 1.21)    | 1.21 (1.00 - 1.47)    |
| <i>FANCG</i>   | 9          | 1.80 (0.53 - 6.16)    | 0.91 (0.16 - 5.10)    | 6.44 (1.60 - 25.98)   |
| <i>FANCM</i>   | 14         | 2.68 (1.29 - 5.54)    | 2.20 (0.94 - 5.16)    | 6.69 (2.86 - 15.65)   |
| <i>FBP1</i>    | 9          | 1.42 (0.24 - 8.49)    | N/A                   | 4.93 (0.69 - 35.41)   |
| <i>FSHR</i>    | 2          | 5.16 (0.60 - 44.26)   | 12.04 (1.35 - 107.49) | N/A                   |
| <i>GEMIN2</i>  | 14         | 0.14 (0.02 - 1.10)    | 0.35 (0.04 - 2.83)    | N/A                   |
| <i>GSTA1</i>   | 6          | 2.87 (1.28 - 6.43)    | 3.20 (1.32 - 7.80)    | 2.13 (0.56 - 8.14)    |
| <i>LCP2</i>    | 5          | 5.01 (0.58 - 42.93)   | 4.30 (0.38 - 49.03)   | 12.46 (1.11 - 140.47) |
| <i>MAPK12</i>  | 22         | 0.48 (0.28 - 0.80)    | 0.42 (0.20 - 0.90)    | 0.29 (0.07 - 1.19)    |
| <i>MBP</i>     | 18         | 4.05 (1.66 - 9.89)    | 4.31 (1.64 - 11.36)   | 1.80 (0.36 - 9.09)    |
| <i>MKI67</i>   | 10         | 1.24 (0.53 - 2.87)    | 1.49 (0.56 - 3.99)    | 2.44 (0.76 - 7.87)    |
| <i>PALB2</i>   | 16         | 6.47 (3.19 - 13.11)   | 5.11 (2.33 - 11.19)   | 6.43 (2.51 - 16.48)   |
| <i>PRDM2</i>   | 1          | 1.95 (1.04 - 3.65)    | 2.27 (1.12 - 4.61)    | 1.06 (0.30 - 3.69)    |
| <i>RAD51D</i>  | 17         | 2.00 (0.37 - 10.91)   | 2.08 (0.29 - 15.18)   | 5.35 (0.75 - 38.18)   |
| <i>SAMD15</i>  | 14         | 1.45 (0.73 - 2.88)    | 1.66 (0.72 - 3.82)    | 3.12 (1.24 - 7.87)    |
| <i>SELP</i>    | 1          | 0.23 (0.08 - 0.69)    | 0.23 (0.05 - 0.98)    | N/A                   |

|                |    |                     |                     |                       |
|----------------|----|---------------------|---------------------|-----------------------|
| <i>SLC26A5</i> | 7  | 2.06 (1.21 - 3.52)  | 1.94 (1.04 - 3.59)  | 2.04 (0.89 - 4.67)    |
| <i>TP53</i>    | 17 | 7.22 (0.89 - 58.53) | 3.42 (0.30 - 38.46) | 15.47 (1.39 - 172.75) |
| <i>TTC4</i>    | 1  | 2.94 (0.80 - 10.87) | 4.98 (1.30 - 18.99) | 1.56 (0.16 - 15.24)   |
| <i>TTLL9</i>   | 20 | 0.26 (0.10 - 0.70)  | 0.09 (0.01 - 0.68)  | N/A                   |
| <i>WDR93</i>   | 15 | 2.62 (0.82 - 8.35)  | 1.21 (0.22 - 6.68)  | 4.84 (1.07 - 21.91)   |
| <i>ZNF404</i>  | 19 | 4.78 (1.36 - 16.80) | 7.35 (1.94 - 27.90) | N/A                   |
| <i>ZSCAN22</i> | 19 | 1.90 (0.95 - 3.82)  | 2.50 (1.18 - 5.31)  | 0.94 (0.21 - 4.22)    |

ER=estrogen receptor

\* Discovery participants were selected for being *BRCA1/2* negative (see methods), replication results are presented for *BRCA1/2*.

**Supplementary Table 4: Gene-Based P-Values from Joint Analysis Including Missense Variants with Suggestive Significance for Breast Cancer Overall, ER-Positive, and ER-Negative Disease**

| Gene            | Chr | Overall  | ER-Positive | ER-Negative |
|-----------------|-----|----------|-------------|-------------|
| <i>ACSM6</i>    | 10  | 0.04     | 0.23        | 3.20E-03    |
| <i>ATR</i>      | 3   | 0.02     | 9.20E-04    | 0.29        |
| <i>BRCA1</i>    | 17  | 2.30E-10 | 0.03        | 4.40E-16    |
| <i>BRCA2</i>    | 13  | 6.70E-10 | 2.30E-04    | 1.30E-14    |
| <i>CASP8AP2</i> | 6   | 2.90E-03 | 0.58        | 0.13        |
| <i>CCDC40</i>   | 17  | 0.1      | 0.12        | 1.20E-04    |
| <i>CDHR2</i>    | 5   | 0.13     | 0.47        | 3.00E-03    |
| <i>CEACAM8</i>  | 19  | 0.22     | 0.19        | 4.90E-03    |
| <i>CHEK2</i>    | 22  | 4.10E-03 | 1.00E-04    | 0.4         |
| <i>DDX56</i>    | 7   | 0.09     | 6.00E-03    | N/A         |
| <i>DHRS4L2</i>  | 14  | 3.60E-03 | 0.1         | 0.19        |
| <i>DSTYK</i>    | 1   | 8.70E-03 | 0.13        | N/A         |
| <i>FANCG</i>    | 9   | 0.15     | 0.35        | 8.60E-03    |
| <i>FANCM</i>    | 14  | 0.04     | 0.2         | 2.90E-06    |
| <i>FAT3</i>     | 11  | 0.29     | 0.49        | 6.60E-03    |
| <i>GEMIN2</i>   | 14  | 7.10E-03 | 0.07        | 0.25        |
| <i>GSTA1</i>    | 6   | 7.90E-03 | 7.60E-03    | 0.26        |
| <i>LCP2</i>     | 5   | 0.15     | 0.31        | 1.80E-03    |
| <i>MBP</i>      | 18  | 3.90E-04 | 7.60E-04    | 0.51        |
| <i>MKI67</i>    | 10  | 0.42     | 0.57        | 3.20E-04    |
| <i>MSH6</i>     | 2   | 4.20E-03 | 3.90E-03    | 0.04        |
| <i>NDOR1</i>    | 9   | 4.70E-03 | 3.10E-03    | 0.07        |
| <i>PALB2</i>    | 16  | 1.80E-08 | 1.30E-05    | 5.90E-05    |

|                |    |          |          |          |
|----------------|----|----------|----------|----------|
| <i>PCDHGC5</i> | 5  | 0.21     | 1.0      | 6.50E-03 |
| <i>PRDM2</i>   | 1  | 4.60E-03 | 0.02     | 0.85     |
| <i>PREX2</i>   | 8  | 0.25     | 0.44     | 8.60E-03 |
| <i>RAD51D</i>  | 17 | 0.44     | 0.17     | 5.40E-03 |
| <i>SAMD15</i>  | 14 | 0.02     | 0.01     | 2.90E-03 |
| <i>SDK2</i>    | 17 | 0.02     | 9.60E-03 | 3.00E-03 |
| <i>SERINC3</i> | 20 | 0.37     | 1.0      | 1.50E-03 |
| <i>SLC26A5</i> | 7  | 0.03     | 0.02     | 4.40E-03 |
| <i>TTC4</i>    | 1  | 7.00E-03 | 6.00E-04 | 0.2      |
| <i>TTL9</i>    | 20 | 6.00E-03 | 4.30E-03 | 0.1      |
| <i>WDR93</i>   | 15 | 0.03     | 0.56     | 1.60E-03 |
| <i>ZNF404</i>  | 19 | 0.01     | 1.20E-04 | N/A      |

Chr=Chromosome; ER=estrogen receptor; LoF=loss of function.

P-values are from gene-based SKAT-O analyses that include LoF and missense variants.

Genes with P<0.01 in any of the three analyses are included in the table.

\* Discovery participants were selected for being *BRCA1/2* negative (see methods), replication results are presented for *BRCA1/2*.

**Supplementary Table 5: Gene-Based Odds Ratios and 95% Confidence Intervals from Joint Analysis Including Missense Variants for Breast Cancer Overall, ER-Positive, and ER-Negative Disease, for Genes with Suggestive Significance**

| Gene            | Chromosome | Overall               | ER-Positive           | ER-Negative           |
|-----------------|------------|-----------------------|-----------------------|-----------------------|
| <i>ACSM6</i>    | 10         | 1.81 (0.72 - 4.54)    | 1.44 (0.47 - 4.39)    | 4.29 (1.34 - 13.74)   |
| <i>ATR</i>      | 3          | 2.58 (1.14 - 5.87)    | 3.84 (1.56 - 9.45)    | 1.51 (0.32 - 7.20)    |
| <i>BRCA1</i>    | 17         | 24.90 (6.05 - 102.50) | 6.00 (1.08 - 33.41)   | 40.73 (8.90 - 186.50) |
| <i>BRCA2</i>    | 13         | 6.47 (3.32 - 12.63)   | 3.84 (1.74 - 8.46)    | 9.53 (4.15 - 21.85)   |
| <i>CASP8AP2</i> | 6          | 1.15 (1.05 - 1.27)    | 1.02 (0.90 - 1.15)    | 0.88 (0.73 - 1.07)    |
| <i>CCDC40</i>   | 17         | 0.62 (0.53 - 0.74)    | 0.57 (0.46 - 0.70)    | 0.53 (0.37 - 0.75)    |
| <i>CDHR2</i>    | 5          | 3.12 (0.63 - 15.48)   | 1.63 (0.23 - 11.69)   | 6.52 (0.89 - 47.68)   |
| <i>CEACAM8</i>  | 19         | 2.61 (0.51 - 13.46)   | 2.81 (0.38 - 20.86)   | 7.06 (0.98 - 50.60)   |
| <i>CHEK2</i>    | 22         | 4.01 (1.50 - 10.77)   | 5.98 (2.04 - 17.50)   | 1.31 (0.15 - 11.44)   |
| <i>DDX56</i>    | 7          | 6.20 (0.75 - 51.53)   | 11.81 (1.34 - 104.03) | N/A                   |
| <i>DHRS4L2</i>  | 14         | 1.11 (1.00 - 1.23)    | 1.06 (0.93 - 1.21)    | 1.21 (1.00 - 1.47)    |
| <i>DSTYK</i>    | 1          | 0.09 (0.01 - 0.70)    | 0.18 (0.02 - 1.37)    | N/A                   |
| <i>FANCG</i>    | 9          | 1.43 (0.45 - 4.51)    | 0.72 (0.14 - 3.80)    | 5.01 (1.33 - 18.83)   |
| <i>FANCM</i>    | 14         | 2.01 (1.08 - 3.74)    | 1.79 (0.85 - 3.77)    | 4.61 (2.13 - 9.96)    |
| <i>FAT3</i>     | 11         | 1.58 (0.71 - 3.49)    | 1.46 (0.54 - 3.89)    | 3.60 (1.34 - 9.62)    |
| <i>GEMIN2</i>   | 14         | 0.27 (0.06 - 1.27)    | 0.35 (0.04 - 2.83)    | 0.86 (0.11 - 6.88)    |
| <i>GSTA1</i>    | 6          | 2.87 (1.28 - 6.43)    | 3.20 (1.32 - 7.80)    | 2.13 (0.56 - 8.14)    |
| <i>LCP2</i>     | 5          | 5.01 (0.58 - 42.93)   | 4.30 (0.38 - 49.03)   | 12.46 (1.11 - 140.47) |
| <i>MBP</i>      | 18         | 4.05 (1.66 - 9.89)    | 4.31 (1.64 - 11.36)   | 1.80 (0.36 - 9.09)    |
| <i>MKI67</i>    | 10         | 1.24 (0.53 - 2.87)    | 1.49 (0.56 - 3.99)    | 2.44 (0.76 - 7.87)    |
| <i>MSH6</i>     | 2          | 0.90 (0.81 - 0.99)    | 1.34 (1.19 - 1.51)    | 1.61 (1.34 - 1.92)    |
| <i>NDOR1</i>    | 9          | 3.09 (1.51 - 6.33)    | 3.61 (1.63 - 7.97)    | 3.23 (1.09 - 9.51)    |
| <i>PALB2</i>    | 16         | 6.47 (3.19 - 13.11)   | 5.11 (2.33 - 11.19)   | 6.43 (2.51 - 16.48)   |
| <i>PCDHGC5</i>  | 5          | 1.07 (0.98 - 1.16)    | 0.88 (0.79 - 0.98)    | 0.86 (0.73 - 1.02)    |



|                |    |                     |                     |                     |
|----------------|----|---------------------|---------------------|---------------------|
| <i>PRDM2</i>   | 1  | 1.17 (0.71 - 1.94)  | 1.33 (0.73 - 2.43)  | 1.05 (0.40 - 2.74)  |
| <i>PREX2</i>   | 8  | 1.07 (0.50 - 2.29)  | 0.43 (0.12 - 1.53)  | 2.68 (1.01 - 7.15)  |
| <i>RAD51D</i>  | 17 | 1.53 (0.43 - 5.45)  | 2.31 (0.57 - 9.38)  | 2.98 (0.54 - 16.44) |
| <i>SAMD15</i>  | 14 | 1.45 (0.73 - 2.88)  | 1.66 (0.72 - 3.82)  | 3.12 (1.24 - 7.87)  |
| <i>SDK2</i>    | 17 | 4.20 (0.89 - 19.78) | 5.14 (0.93 - 28.36) | 6.71 (0.94 - 48.04) |
| <i>SERINC3</i> | 20 | 1.40 (0.44 - 4.41)  | 0.81 (0.15 - 4.34)  | 4.67 (1.23 - 17.76) |
| <i>SLC26A5</i> | 7  | 2.12 (1.25 - 3.62)  | 1.94 (1.04 - 3.59)  | 2.04 (0.89 - 4.67)  |
| <i>TTC4</i>    | 1  | 2.94 (0.80 - 10.87) | 4.98 (1.30 - 18.99) | 1.56 (0.16 - 15.24) |
| <i>TTL9</i>    | 20 | 0.43 (0.21 - 0.91)  | 0.15 (0.04 - 0.64)  | 0.48 (0.11 - 2.03)  |
| <i>WDR93</i>   | 15 | 2.84 (0.90 - 8.94)  | 1.65 (0.36 - 7.53)  | 4.84 (1.07 - 21.91) |
| <i>ZNF404</i>  | 19 | 4.78 (1.36 - 16.80) | 7.35 (1.94 - 27.90) | N/A                 |

ER=estrogen receptor

\* Discovery participants were selected for being *BRCA1/2* negative (see methods), replication results are presented for *BRCA1/2*.

## Supplementary Methods: Genes Selected for Replication Based on Discovery Findings

|                |                  |                 |
|----------------|------------------|-----------------|
| <i>AAMDC</i>   | <i>APCDD1</i>    | <i>BRIP1</i>    |
| <i>AARS</i>    | <i>APEX1</i>     | <i>BTN3A2</i>   |
| <i>ABCA1</i>   | <i>APOC3</i>     | <i>BUB1B</i>    |
| <i>ABCA4</i>   | <i>AR</i>        | <i>C12orf10</i> |
| <i>ABCB5</i>   | <i>AREL1</i>     | <i>C12orf80</i> |
| <i>ABCC1</i>   | <i>ARHGAP28</i>  | <i>C16orf45</i> |
| <i>ABCC10</i>  | <i>ARHGAP35</i>  | <i>C17orf77</i> |
| <i>ACOT11</i>  | <i>ARHGEF10L</i> | <i>C17orf82</i> |
| <i>ACOXL</i>   | <i>ARHGEF2</i>   | <i>C2</i>       |
| <i>ACSBG2</i>  | <i>ARI1B</i>     | <i>C2orf47</i>  |
| <i>ACSL1</i>   | <i>ARID1A</i>    | <i>C3</i>       |
| <i>ACSM5</i>   | <i>ARID4A</i>    | <i>C4orf46</i>  |
| <i>ACSM6</i>   | <i>ARID5B</i>    | <i>C5orf60</i>  |
| <i>ACTR1B</i>  | <i>ARL5C</i>     | <i>C7</i>       |
| <i>ADAM20</i>  | <i>ARPC1B</i>    | <i>C9</i>       |
| <i>ADAM8</i>   | <i>ASCC1</i>     | <i>CA9</i>      |
| <i>ADAMTS5</i> | <i>ASIC3</i>     | <i>CACNA2D1</i> |
| <i>ADCY10</i>  | <i>ASPM</i>      | <i>CAPN15</i>   |
| <i>ADCY4</i>   | <i>ASTN2</i>     | <i>CAPN5</i>    |
| <i>ADGRG7</i>  | <i>ATAD3C</i>    | <i>CARD14</i>   |
| <i>ADH7</i>    | <i>ATM</i>       | <i>CASP8</i>    |
| <i>AGL</i>     | <i>ATP1A4</i>    | <i>CASP8AP2</i> |
| <i>AIF1</i>    | <i>ATP2B2</i>    | <i>CATSPERB</i> |
| <i>AKT1</i>    | <i>ATR</i>       | <i>CAV3</i>     |
| <i>ALCAM</i>   | <i>ATXN7</i>     | <i>CBWD1</i>    |
| <i>ALDH1B1</i> | <i>B4GALT7</i>   | <i>CBX2</i>     |
| <i>ALKBH8</i>  | <i>BABAM1</i>    | <i>CBX8</i>     |
| <i>ALOX15</i>  | <i>BAG1</i>      | <i>CCAR1</i>    |
| <i>ALPK1</i>   | <i>BAHD1</i>     | <i>CCDC110</i>  |
| <i>AMZ1</i>    | <i>BAP1</i>      | <i>CCDC40</i>   |
| <i>ANKDD1B</i> | <i>BARD1</i>     | <i>CCHCR1</i>   |
| <i>ANKRD2</i>  | <i>BATF2</i>     | <i>CCL5</i>     |
| <i>ANKRD23</i> | <i>BAZ1A</i>     | <i>CCM2L</i>    |
| <i>ANKRD54</i> | <i>BCHE</i>      | <i>CCND1</i>    |
| <i>ANKS4B</i>  | <i>BCL9</i>      | <i>CCNT1</i>    |
| <i>ANP32E</i>  | <i>BIN1</i>      | <i>CCNT2</i>    |
| <i>ANXA3</i>   | <i>BIN2</i>      | <i>CCR3</i>     |
| <i>ANXA4</i>   | <i>BLM</i>       | <i>CCT6B</i>    |
| <i>AOC2</i>    | <i>BMP5</i>      | <i>CD101</i>    |
| <i>AP2S1</i>   | <i>BOC</i>       | <i>CD109</i>    |
| <i>APAF1</i>   | <i>BRCA1</i>     | <i>CD244</i>    |
| <i>APBB2</i>   | <i>BRCA2</i>     | <i>CD44</i>     |

|                 |                |                 |
|-----------------|----------------|-----------------|
| <i>CD46</i>     | <i>CNTN5</i>   | <i>DNAJC9</i>   |
| <i>CD96</i>     | <i>CNTN6</i>   | <i>DNTT</i>     |
| <i>CDC20</i>    | <i>CPT1B</i>   | <i>DOCK1</i>    |
| <i>CDCA5</i>    | <i>CRACR2B</i> | <i>DOK4</i>     |
| <i>CDH1</i>     | <i>CREB3L3</i> | <i>DPF3</i>     |
| <i>CDH18</i>    | <i>CREB3L4</i> | <i>DPPA3</i>    |
| <i>CDH26</i>    | <i>CRIPAK</i>  | <i>DSG1</i>     |
| <i>CDH3</i>     | <i>CRLF3</i>   | <i>DSG2</i>     |
| <i>CDHR2</i>    | <i>CSF2RB</i>  | <i>DSP</i>      |
| <i>CDIP1</i>    | <i>CTBP2</i>   | <i>DSTYK</i>    |
| <i>CDK13</i>    | <i>CTC1</i>    | <i>DTNA</i>     |
| <i>CDK5R2</i>   | <i>CTCF</i>    | <i>DUOX2</i>    |
| <i>CDK5RAP2</i> | <i>CTNNB1</i>  | <i>DUOXA2</i>   |
| <i>CDKN1B</i>   | <i>CTSH</i>    | <i>DUSP10</i>   |
| <i>CDKN2A</i>   | <i>CXCL10</i>  | <i>DUSP12</i>   |
| <i>CDNF</i>     | <i>CYFIP2</i>  | <i>DUSP16</i>   |
| <i>CEACAM1</i>  | <i>CYP26B1</i> | <i>E2F3</i>     |
| <i>CEACAM21</i> | <i>CYP2R1</i>  | <i>ECD</i>      |
| <i>CECR1</i>    | <i>DARS2</i>   | <i>ECM1</i>     |
| <i>CELSR2</i>   | <i>DCHS2</i>   | <i>ECSIT</i>    |
| <i>CENPT</i>    | <i>DCLK1</i>   | <i>ECT2</i>     |
| <i>CEP152</i>   | <i>DCTN1</i>   | <i>EGFR</i>     |
| <i>CEP250</i>   | <i>DDX25</i>   | <i>EID2</i>     |
| <i>CFAP206</i>  | <i>DDX39B</i>  | <i>EIF2A</i>    |
| <i>CFAP70</i>   | <i>DDX43</i>   | <i>EIF2B3</i>   |
| <i>CFAP99</i>   | <i>DDX56</i>   | <i>EIF2S2</i>   |
| <i>CFH</i>      | <i>DDX58</i>   | <i>EIF4EBP2</i> |
| <i>CGNL1</i>    | <i>DEFB115</i> | <i>EIF4G2</i>   |
| <i>CHAC1</i>    | <i>DEFB128</i> | <i>ELAC2</i>    |
| <i>CHAF1B</i>   | <i>DEFB132</i> | <i>ELMO2</i>    |
| <i>CHD6</i>     | <i>DEPDC5</i>  | <i>ELP3</i>     |
| <i>CHEK2</i>    | <i>DGKZ</i>    | <i>EMP1</i>     |
| <i>CHRND</i>    | <i>DGUOK</i>   | <i>ENAH</i>     |
| <i>CITED2</i>   | <i>DHRS4</i>   | <i>EP300</i>    |
| <i>CLDN3</i>    | <i>DHX37</i>   | <i>EPCAM</i>    |
| <i>CLEC10A</i>  | <i>DIAPH3</i>  | <i>EQTN</i>     |
| <i>CLEC11A</i>  | <i>DICER1</i>  | <i>ERAP2</i>    |
| <i>CLSTN1</i>   | <i>DKK3</i>    | <i>ERBB3</i>    |
| <i>CLSTN2</i>   | <i>DLD</i>     | <i>ERCC2</i>    |
| <i>CLSTN3</i>   | <i>DLG1</i>    | <i>ERCC3</i>    |
| <i>CMA1</i>     | <i>DLGAP1</i>  | <i>ERCC4</i>    |
| <i>CNKSRI</i>   | <i>DNAJA4</i>  | <i>ERCC6</i>    |
| <i>CNR2</i>     | <i>DNAJC10</i> | <i>ERCC8</i>    |
| <i>CNTD1</i>    | <i>DNAJC5B</i> | <i>ETV4</i>     |

|                    |                  |                  |
|--------------------|------------------|------------------|
| <i>ETV5</i>        | <i>FSHR</i>      | <i>HNF1A</i>     |
| <i>EVPL</i>        | <i>FSTL1</i>     | <i>HNF1B</i>     |
| <i>EXO1</i>        | <i>FUZ</i>       | <i>HNRNPCL3</i>  |
| <i>EXOC6</i>       | <i>FZD2</i>      | <i>HOXC11</i>    |
| <i>EXOSC1</i>      | <i>GALNT2</i>    | <i>HPCA</i>      |
| <i>EXOSC10</i>     | <i>GAPDHS</i>    | <i>HPGDS</i>     |
| <i>EYA3</i>        | <i>GART</i>      | <i>HPS6</i>      |
| <i>EZH2</i>        | <i>GATA3</i>     | <i>HRG</i>       |
| <i>FAM120A</i>     | <i>GCNT3</i>     | <i>ICAM1</i>     |
| <i>FAM160A2</i>    | <i>GEMIN2</i>    | <i>IFIH1</i>     |
| <i>FAM219B</i>     | <i>GEMIN4</i>    | <i>IFIT1</i>     |
| <i>FANCA</i>       | <i>GFM2</i>      | <i>IFIT2</i>     |
| <i>FANCC</i>       | <i>GFRAL</i>     | <i>IFNA10</i>    |
| <i>FANCD2</i>      | <i>GHR</i>       | <i>IFNAR2</i>    |
| <i>FANCG</i>       | <i>GHSR</i>      | <i>IFNW1</i>     |
| <i>FANCL</i>       | <i>GJA10</i>     | <i>IGF2BP1</i>   |
| <i>FANCM</i>       | <i>GJB2</i>      | <i>IK</i>        |
| <i>FARP1</i>       | <i>GK2</i>       | <i>IL10RA</i>    |
| <i>FASTKD2</i>     | <i>GLI2</i>      | <i>IL18RAP</i>   |
| <i>FAT2</i>        | <i>GLMP</i>      | <i>IL23R</i>     |
| <i>FAT3</i>        | <i>GLP2R</i>     | <i>IL2RB</i>     |
| <i>FBN1</i>        | <i>GLT1D1</i>    | <i>IL33</i>      |
| <i>FBP1</i>        | <i>GMFG</i>      | <i>IL5RA</i>     |
| <i>FBXO18</i>      | <i>GNA14</i>     | <i>ILK</i>       |
| <i>FBXW7</i>       | <i>GOT1</i>      | <i>IQCA1</i>     |
| <i>FCGR1A</i>      | <i>GP6</i>       | <i>IRAK2</i>     |
| <i>FCGR2B</i>      | <i>GPR155</i>    | <i>IRF3</i>      |
| <i>FCGR3B</i>      | <i>GPR55</i>     | <i>ITGA2B</i>    |
| <i>FDFT1</i>       | <i>GPRC6A</i>    | <i>ITGA3</i>     |
| <i>FECH</i>        | <i>GRB7</i>      | <i>ITGB3</i>     |
| <i>FERMT2</i>      | <i>GRHL3</i>     | <i>JAK2</i>      |
| <i>FES</i>         | <i>GRIP1</i>     | <i>JAM2</i>      |
| <i>FGF19</i>       | <i>GSN</i>       | <i>JMJD8</i>     |
| <i>FKBP1B</i>      | <i>GSTA1</i>     | <i>KARS</i>      |
| <i>FLRT2</i>       | <i>GTF2H1</i>    | <i>KHNYN</i>     |
| <i>FLT4</i>        | <i>GTF2H3</i>    | <i>KIAA0319L</i> |
| <i>FMO1</i>        | <i>GYS1</i>      | <i>KIAA0368</i>  |
| <i>FOLR1</i>       | <i>HABP2</i>     | <i>KIAA1524</i>  |
| <i>FOXA3</i>       | <i>HBP1</i>      | <i>KIF26B</i>    |
| <i>FPGS</i>        | <i>HDAC1</i>     | <i>KIRREL2</i>   |
| <i>FPGT-TNNI3K</i> | <i>HEATR1</i>    | <i>KLF12</i>     |
| <i>FREM1</i>       | <i>HIST1H2BO</i> | <i>KLF3</i>      |
| <i>FRRS1L</i>      | <i>HIST4H4</i>   | <i>KLHL17</i>    |
| <i>FRS3</i>        | <i>HLTF</i>      | <i>KLK7</i>      |

|                     |                 |                |
|---------------------|-----------------|----------------|
| <i>KRTAP25-1</i>    | <i>MBP</i>      | <i>NCF1</i>    |
| <i>LACTB2</i>       | <i>MC1R</i>     | <i>NCOA6</i>   |
| <i>LAMC2</i>        | <i>MCL1</i>     | <i>NCR3LG1</i> |
| <i>LAMP1</i>        | <i>MCM4</i>     | <i>NDOR1</i>   |
| <i>LAMP5</i>        | <i>MCM6</i>     | <i>NEDD9</i>   |
| <i>LARP4</i>        | <i>MCTP1</i>    | <i>NEIL1</i>   |
| <i>LCN2</i>         | <i>MDC1</i>     | <i>NEK1</i>    |
| <i>LCNL1</i>        | <i>MDM4</i>     | <i>NEK8</i>    |
| <i>LCP2</i>         | <i>ME1</i>      | <i>NEK9</i>    |
| <i>LDLR</i>         | <i>MED1</i>     | <i>NELL1</i>   |
| <i>LHX1</i>         | <i>MED16</i>    | <i>NF1</i>     |
| <i>LIF</i>          | <i>MELK</i>     | <i>NHP2</i>    |
| <i>LIM2</i>         | <i>MEOX2</i>    | <i>NID2</i>    |
| <i>LIPM</i>         | <i>METTL17</i>  | <i>NLRP1</i>   |
| <i>LMO4</i>         | <i>METTL21A</i> | <i>NLRP11</i>  |
| <i>LOC100129697</i> | <i>MFAP5</i>    | <i>NLRP12</i>  |
| <i>LOC107984974</i> | <i>MFN1</i>     | <i>NLRP2</i>   |
| <i>LONP1</i>        | <i>MISP3</i>    | <i>NLRP7</i>   |
| <i>LOXL4</i>        | <i>MKI67</i>    | <i>NOG</i>     |
| <i>LPL</i>          | <i>MLANA</i>    | <i>NOTCH3</i>  |
| <i>LRBA</i>         | <i>MLH1</i>     | <i>NOTCH4</i>  |
| <i>LRP4</i>         | <i>MLH3</i>     | <i>NOTO</i>    |
| <i>LRRCC1</i>       | <i>MLN</i>      | <i>NPR3</i>    |
| <i>LRRK1</i>        | <i>MME</i>      | <i>NR0B2</i>   |
| <i>LRRK2</i>        | <i>MMP1</i>     | <i>NRBP2</i>   |
| <i>LRTOMT</i>       | <i>MMP21</i>    | <i>NRCAM</i>   |
| <i>LSM14A</i>       | <i>MOS</i>      | <i>NRN1</i>    |
| <i>LTA4H</i>        | <i>MPND</i>     | <i>NRXN1</i>   |
| <i>LY96</i>         | <i>MPZL2</i>    | <i>NSA2</i>    |
| <i>MAD1L1</i>       | <i>MRE11A</i>   | <i>NT5C</i>    |
| <i>MAGOHB</i>       | <i>MRPS9</i>    | <i>NTRK1</i>   |
| <i>MANSC4</i>       | <i>MSH2</i>     | <i>NTRK2</i>   |
| <i>MAP2K4</i>       | <i>MSH4</i>     | <i>NUP188</i>  |
| <i>MAP3K1</i>       | <i>MSH6</i>     | <i>NUP210</i>  |
| <i>MAP3K11</i>      | <i>MTFR1L</i>   | <i>NUP210L</i> |
| <i>MAP3K5</i>       | <i>MTHFD1</i>   | <i>NUP58</i>   |
| <i>MAP3K9</i>       | <i>MTHFR</i>    | <i>NUPR1</i>   |
| <i>MAP4</i>         | <i>MUTYH</i>    | <i>NWD1</i>    |
| <i>MAPK12</i>       | <i>MXRA7</i>    | <i>NXPE2</i>   |
| <i>MAPK14</i>       | <i>N4BP2</i>    | <i>OBSL1</i>   |
| <i>MAPK9</i>        | <i>NAE1</i>     | <i>OGG1</i>    |
| <i>MARC2</i>        | <i>NAP1L4</i>   | <i>OSBPL1A</i> |
| <i>MASP2</i>        | <i>NBN</i>      | <i>OSBPL9</i>  |
| <i>MBD2</i>         | <i>NBPF3</i>    | <i>OXSRI</i>   |

|                 |                 |                |
|-----------------|-----------------|----------------|
| <i>PAFAH1B2</i> | <i>PLAT</i>     | <i>PTPRF</i>   |
| <i>PALB2</i>    | <i>PLCG2</i>    | <i>PVRL2</i>   |
| <i>PAPOLA</i>   | <i>PLCH1</i>    | <i>PXDN</i>    |
| <i>PAPOLG</i>   | <i>PLCL2</i>    | <i>PXK</i>     |
| <i>PAPSS1</i>   | <i>PLEKHG5</i>  | <i>PYGO2</i>   |
| <i>PAQR3</i>    | <i>PLG</i>      | <i>QRSL1</i>   |
| <i>PARN</i>     | <i>PLGRKT</i>   | <i>R3HCC1L</i> |
| <i>PARP2</i>    | <i>PLPPR3</i>   | <i>RAB25</i>   |
| <i>PATE3</i>    | <i>PMS1</i>     | <i>RAB34</i>   |
| <i>PBK</i>      | <i>POLG</i>     | <i>RAB42</i>   |
| <i>PBX4</i>     | <i>POLQ</i>     | <i>RABL6</i>   |
| <i>PCDH20</i>   | <i>POM121C</i>  | <i>RAD17</i>   |
| <i>PCDHA11</i>  | <i>PPFIBP1</i>  | <i>RAD18</i>   |
| <i>PCDHB3</i>   | <i>PPIE</i>     | <i>RAD21</i>   |
| <i>PCDHGA3</i>  | <i>PPIP5K1</i>  | <i>RAD50</i>   |
| <i>PCDHGA4</i>  | <i>PPP1R12A</i> | <i>RAD51B</i>  |
| <i>PCDHGA5</i>  | <i>PPP1R42</i>  | <i>RAD51C</i>  |
| <i>PCDHGA9</i>  | <i>PPP2R1A</i>  | <i>RAD51D</i>  |
| <i>PCDHGB2</i>  | <i>PPP2R3A</i>  | <i>RAD52</i>   |
| <i>PCDHGB5</i>  | <i>PPP3CA</i>   | <i>RARS</i>    |
| <i>PCDHGC3</i>  | <i>PRAC2</i>    | <i>RASAL2</i>  |
| <i>PCDHGC5</i>  | <i>PRAMEF17</i> | <i>RASIP1</i>  |
| <i>PCSK4</i>    | <i>PRDM2</i>    | <i>RB1</i>     |
| <i>PDCD6IP</i>  | <i>PRDM7</i>    | <i>RBBP8</i>   |
| <i>PDE4B</i>    | <i>PRELP</i>    | <i>RBBP8NL</i> |
| <i>PDIA3</i>    | <i>PREX1</i>    | <i>RBKS</i>    |
| <i>PDIA4</i>    | <i>PREX2</i>    | <i>RBM19</i>   |
| <i>PDIA5</i>    | <i>PRKAR2A</i>  | <i>RBM6</i>    |
| <i>PDLIM1</i>   | <i>PRKCE</i>    | <i>RCHY1</i>   |
| <i>PDZD8</i>    | <i>PRKRA</i>    | <i>RECQL</i>   |
| <i>PELO</i>     | <i>PRMT9</i>    | <i>RECQL5</i>  |
| <i>PER3</i>     | <i>PRODH</i>    | <i>REST</i>    |
| <i>PFDN6</i>    | <i>PRPF19</i>   | <i>RHNO1</i>   |
| <i>PGLYRP3</i>  | <i>PSAP</i>     | <i>RHOBTB1</i> |
| <i>PGLYRP4</i>  | <i>PSMC3IP</i>  | <i>RHOF</i>    |
| <i>PGM5</i>     | <i>PSMD13</i>   | <i>RIC1</i>    |
| <i>PHC2</i>     | <i>PTEN</i>     | <i>RIPK4</i>   |
| <i>PIK3C2G</i>  | <i>PTGDR2</i>   | <i>RLF</i>     |
| <i>PIK3CA</i>   | <i>PTGER4</i>   | <i>RMDN1</i>   |
| <i>PIK3CG</i>   | <i>PTGES3</i>   | <i>RNASE7</i>  |
| <i>PIK3R1</i>   | <i>PTGIS</i>    | <i>RNASEL</i>  |
| <i>PIK3R3</i>   | <i>PTGS1</i>    | <i>RNF135</i>  |
| <i>PKLR</i>     | <i>PTPN11</i>   | <i>RNF138</i>  |
| <i>PKP4</i>     | <i>PTPRD</i>    | <i>RNF187</i>  |

|                |                 |                 |
|----------------|-----------------|-----------------|
| <i>RNF34</i>   | <i>SLC12A4</i>  | <i>SYT1</i>     |
| <i>RNF44</i>   | <i>SLC16A1</i>  | <i>SZT2</i>     |
| <i>ROBO2</i>   | <i>SLC19A1</i>  | <i>TAB2</i>     |
| <i>ROBO4</i>   | <i>SLC26A5</i>  | <i>TACC2</i>    |
| <i>RORA</i>    | <i>SLC27A5</i>  | <i>TAF6</i>     |
| <i>RP1L1</i>   | <i>SLC36A1</i>  | <i>TARSL2</i>   |
| <i>RRBP1</i>   | <i>SLC37A4</i>  | <i>TAX1BP3</i>  |
| <i>RREB1</i>   | <i>SLC44A2</i>  | <i>TBC1D2</i>   |
| <i>RTEL1</i>   | <i>SLC6A2</i>   | <i>TBC1D23</i>  |
| <i>RTTN</i>    | <i>SLX4</i>     | <i>TBX3</i>     |
| <i>S100A13</i> | <i>SMARCE1</i>  | <i>TCEA1</i>    |
| <i>SALL1</i>   | <i>SMPDL3A</i>  | <i>TCF7L1</i>   |
| <i>SAMD15</i>  | <i>SNAPC1</i>   | <i>TEK</i>      |
| <i>SASH1</i>   | <i>SNRNP200</i> | <i>TF</i>       |
| <i>SAXO1</i>   | <i>SNX8</i>     | <i>TFAP4</i>    |
| <i>SAXO2</i>   | <i>SORD</i>     | <i>THAP5</i>    |
| <i>SBF2</i>    | <i>SPAST</i>    | <i>THBS4</i>    |
| <i>SCMH1</i>   | <i>SPATA18</i>  | <i>THPO</i>     |
| <i>SCYL3</i>   | <i>SPHK1</i>    | <i>THRA</i>     |
| <i>SDCBP2</i>  | <i>SPINK5</i>   | <i>TIMELESS</i> |
| <i>SDCCAG3</i> | <i>SPINT1</i>   | <i>TIMM44</i>   |
| <i>SDHB</i>    | <i>SPIRE2</i>   | <i>TINAG</i>    |
| <i>SDK1</i>    | <i>SPOP</i>     | <i>TLDC2</i>    |
| <i>SDK2</i>    | <i>SPPL2A</i>   | <i>TLN2</i>     |
| <i>SECTM1</i>  | <i>SPSB2</i>    | <i>TLR4</i>     |
| <i>SELP</i>    | <i>SPTBN5</i>   | <i>TMEM221</i>  |
| <i>SEMA6D</i>  | <i>SQRDL</i>    | <i>TMEM254</i>  |
| <i>SERGEF</i>  | <i>SQSTM1</i>   | <i>TMEM59</i>   |
| <i>SERINC3</i> | <i>SRA1</i>     | <i>TNFAIP6</i>  |
| <i>SERINC5</i> | <i>SRGAP1</i>   | <i>TNFSF18</i>  |
| <i>SETD2</i>   | <i>SSC5D</i>    | <i>TNS1</i>     |
| <i>SETSIP</i>  | <i>STAB1</i>    | <i>TOB2</i>     |
| <i>SETX</i>    | <i>STAG3</i>    | <i>TP53</i>     |
| <i>SF3A3</i>   | <i>STARD5</i>   | <i>TRAK1</i>    |
| <i>SFPQ</i>    | <i>STARD9</i>   | <i>TRIM31</i>   |
| <i>SFRP5</i>   | <i>STC2</i>     | <i>TRIM32</i>   |
| <i>SH2D3C</i>  | <i>STK11</i>    | <i>TRIM6</i>    |
| <i>SHC2</i>    | <i>STK31</i>    | <i>TRIM63</i>   |
| <i>SHCBP1</i>  | <i>STK36</i>    | <i>TRIM71</i>   |
| <i>SIDT2</i>   | <i>STMND1</i>   | <i>TRIO</i>     |
| <i>SIGLEC1</i> | <i>SUCLG2</i>   | <i>TRIOBP</i>   |
| <i>SIVA1</i>   | <i>SUCO</i>     | <i>TRIP13</i>   |
| <i>SKA2</i>    | <i>SVIL</i>     | <i>TRMU</i>     |
| <i>SKA3</i>    | <i>SYN3</i>     | <i>TROAP</i>    |

|                |                 |                     |
|----------------|-----------------|---------------------|
| <i>TRPV1</i>   | <i>USP19</i>    | <i>XYLB</i>         |
| <i>TSC2</i>    | <i>USP25</i>    | <i>ZBTB40</i>       |
| <i>TSPAN15</i> | <i>USP49</i>    | <i>ZDHHC2</i>       |
| <i>TSPO</i>    | <i>USP54</i>    | <i>ZFP36L2</i>      |
| <i>TTC21B</i>  | <i>USP6</i>     | <i>ZFR2</i>         |
| <i>TTC4</i>    | <i>VANGL2</i>   | <i>ZFYVE1</i>       |
| <i>TTC7A</i>   | <i>VAR2</i>     | <i>ZHX1-C8orf76</i> |
| <i>TTLL9</i>   | <i>VCL</i>      | <i>ZNF195</i>       |
| <i>TUB</i>     | <i>VLDLR</i>    | <i>ZNF257</i>       |
| <i>TUBE1</i>   | <i>VRK2</i>     | <i>ZNF266</i>       |
| <i>TUBGCP2</i> | <i>WDHD1</i>    | <i>ZNF335</i>       |
| <i>TUT1</i>    | <i>WDR7</i>     | <i>ZNF358</i>       |
| <i>TXLNA</i>   | <i>WDR93</i>    | <i>ZNF385B</i>      |
| <i>TXNDC11</i> | <i>WEE2</i>     | <i>ZNF404</i>       |
| <i>TYK2</i>    | <i>WRAP53</i>   | <i>ZNF510</i>       |
| <i>TYR</i>     | <i>WRN</i>      | <i>ZNF521</i>       |
| <i>UBA7</i>    | <i>WTAP</i>     | <i>ZNF528</i>       |
| <i>UBE2U</i>   | <i>XAB2</i>     | <i>ZNF560</i>       |
| <i>UFM1</i>    | <i>XAF1</i>     | <i>ZNF778</i>       |
| <i>UGT1A1</i>  | <i>XPC</i>      | <i>ZNF8</i>         |
| <i>UMODL1</i>  | <i>XPENPEP1</i> | <i>ZNF816</i>       |
| <i>URB2</i>    | <i>XRCC1</i>    | <i>ZNF880</i>       |
| <i>USH1C</i>   | <i>XRCC2</i>    | <i>ZSCAN22</i>      |
| <i>USP17L1</i> | <i>XRCC3</i>    |                     |
